# Supplementary material for: A porous aerogel nanocomposite of silver nanoparticles-functionalized cellulose nanofibrils for SERS detection and catalytic degradation of rhodamine B
Source: Royal Society of Chemistry journal article supplement (doi:10.1039/c5ra18806g), 2015-01-01
Supplement: c5ra18806g1.pdf [file c5ra18806g1.pdf]

## Supplementary Information

### Porous aerogel nanocomposite of silver nanoparticles-functionalized cellulose nanofibrils for SERS detection and catalytic degradation of Rhodamine B

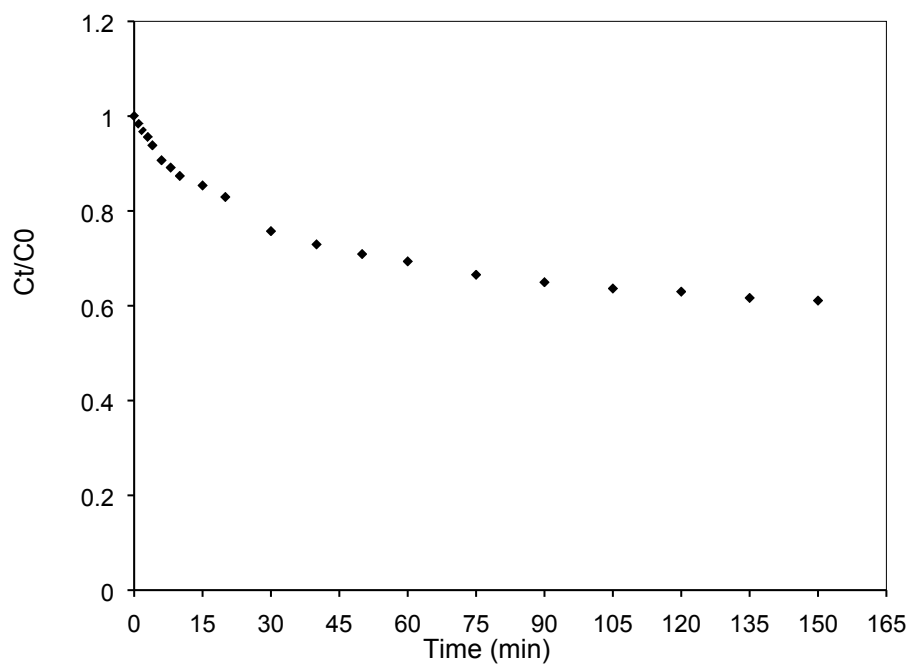

Figure S1 Plot  $C_t/C_0$  of the RhB degradation using  $\text{NaBH}_4$  without presence of CNF-AgNPs nanocomposite
